# Supplementary material
Source: Springer Nature journal article supplement (https://www.springermedizin.de/resource/supplementary/12885_2007_959_MOESM5_ESM.pdf/9471234)

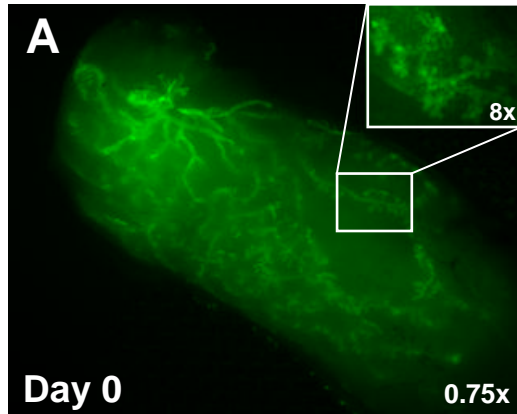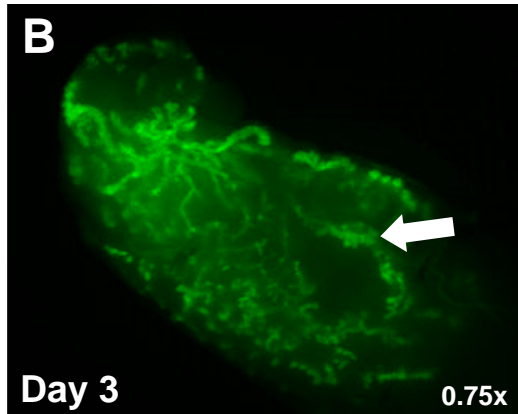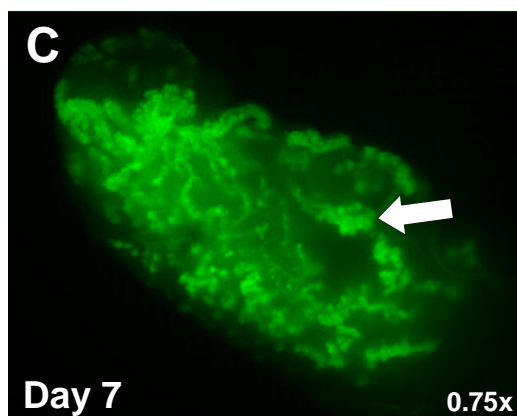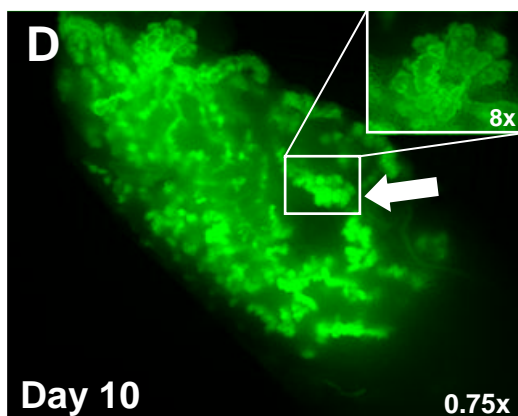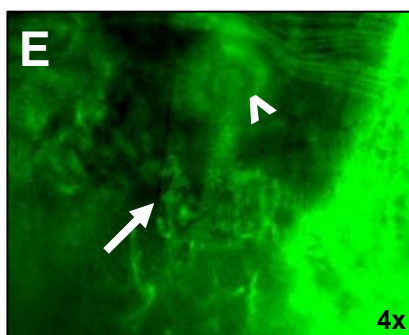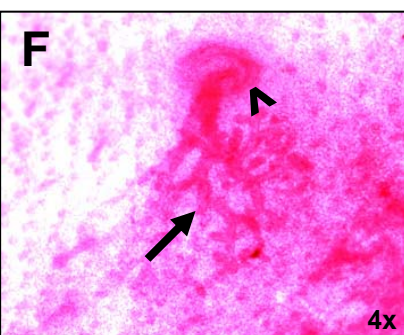

Pre-Transplant  
Newborn

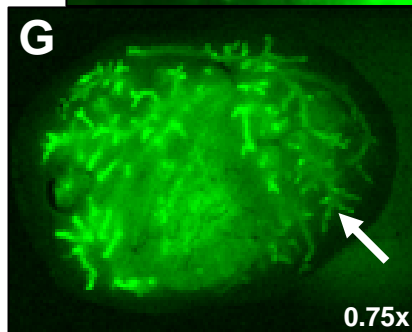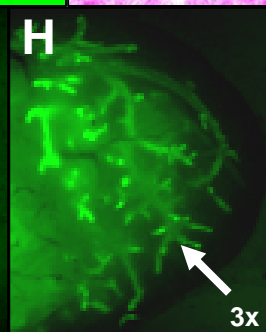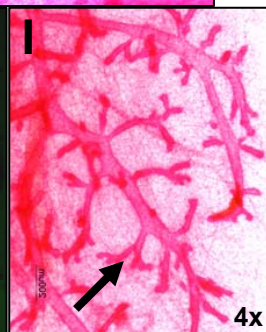

Post-Transplant  
Non-Pregnant

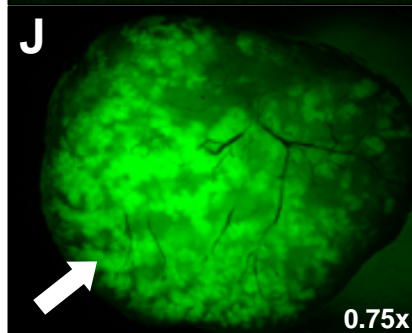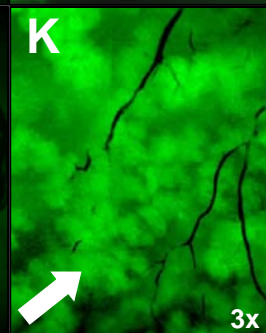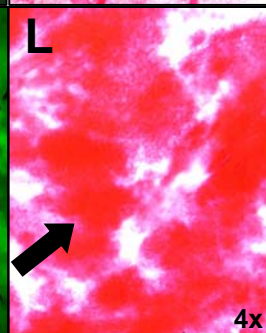

Post-Transplant  
Pregnant

Supplement: MOESM5 [file 9471234]
